# Supplementary figures and images for: The surface albedo of the Greenland Ice Sheet between 1982 and 2015, and its relationship to the ice sheet’s surface mass balance and ice discharge
Source: Copernicus journal article supplement (doi:10.5194/tc-2019-65), 2019-04-10

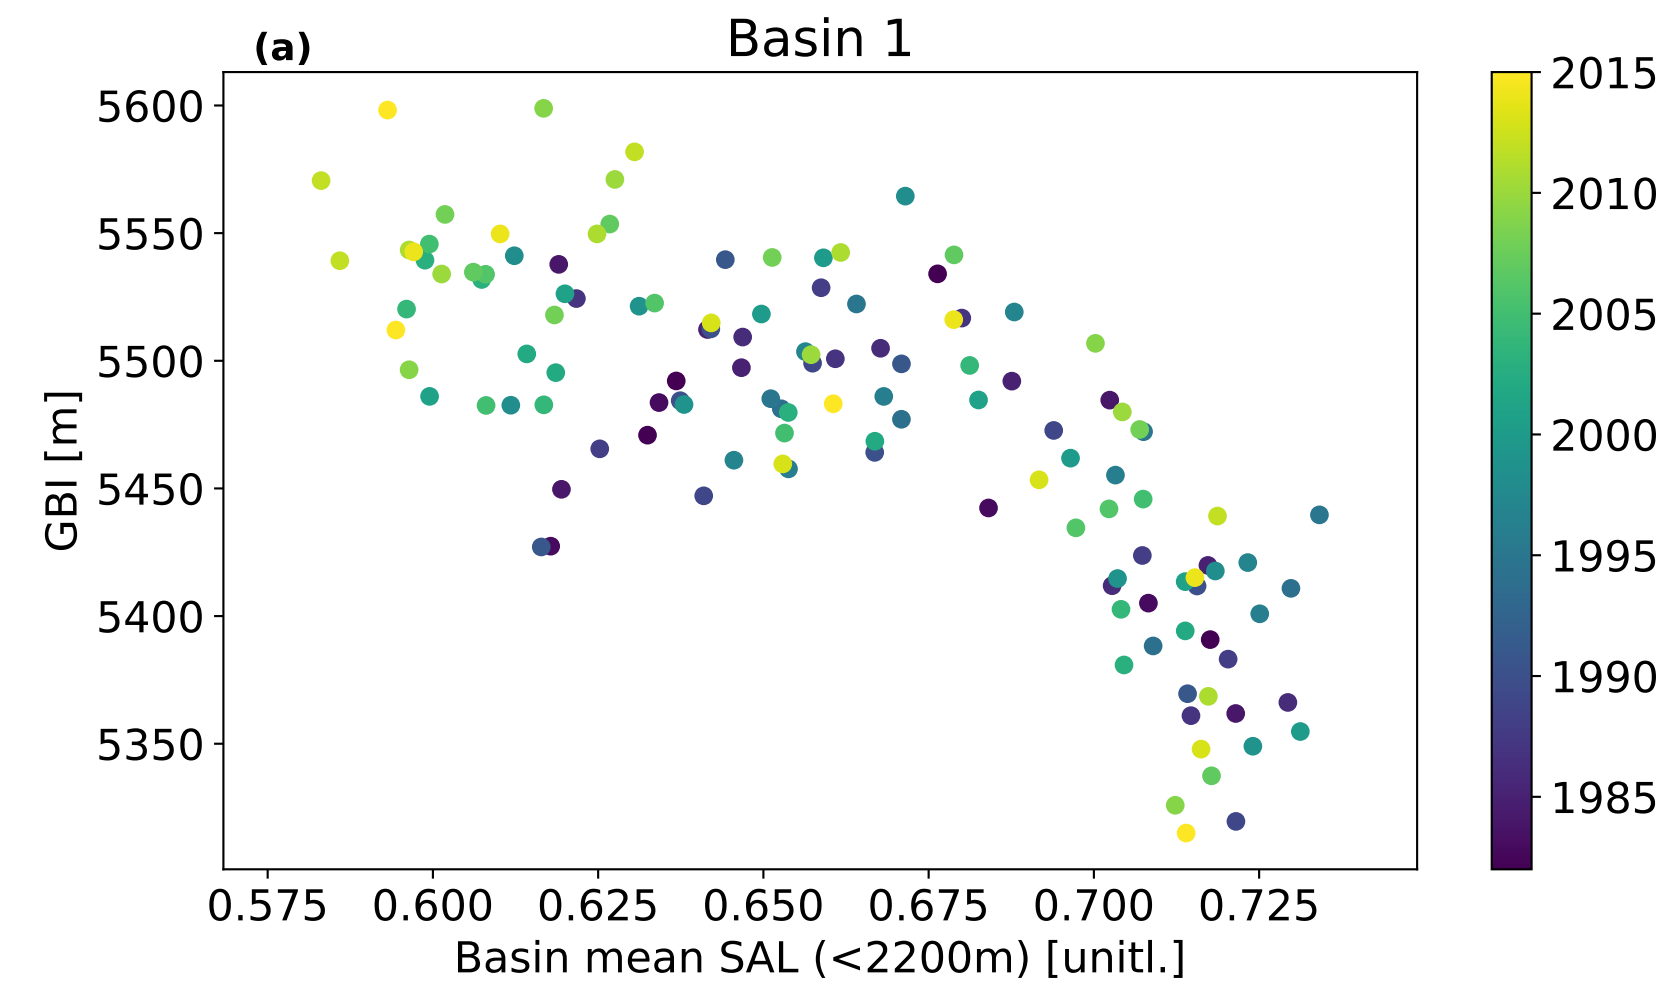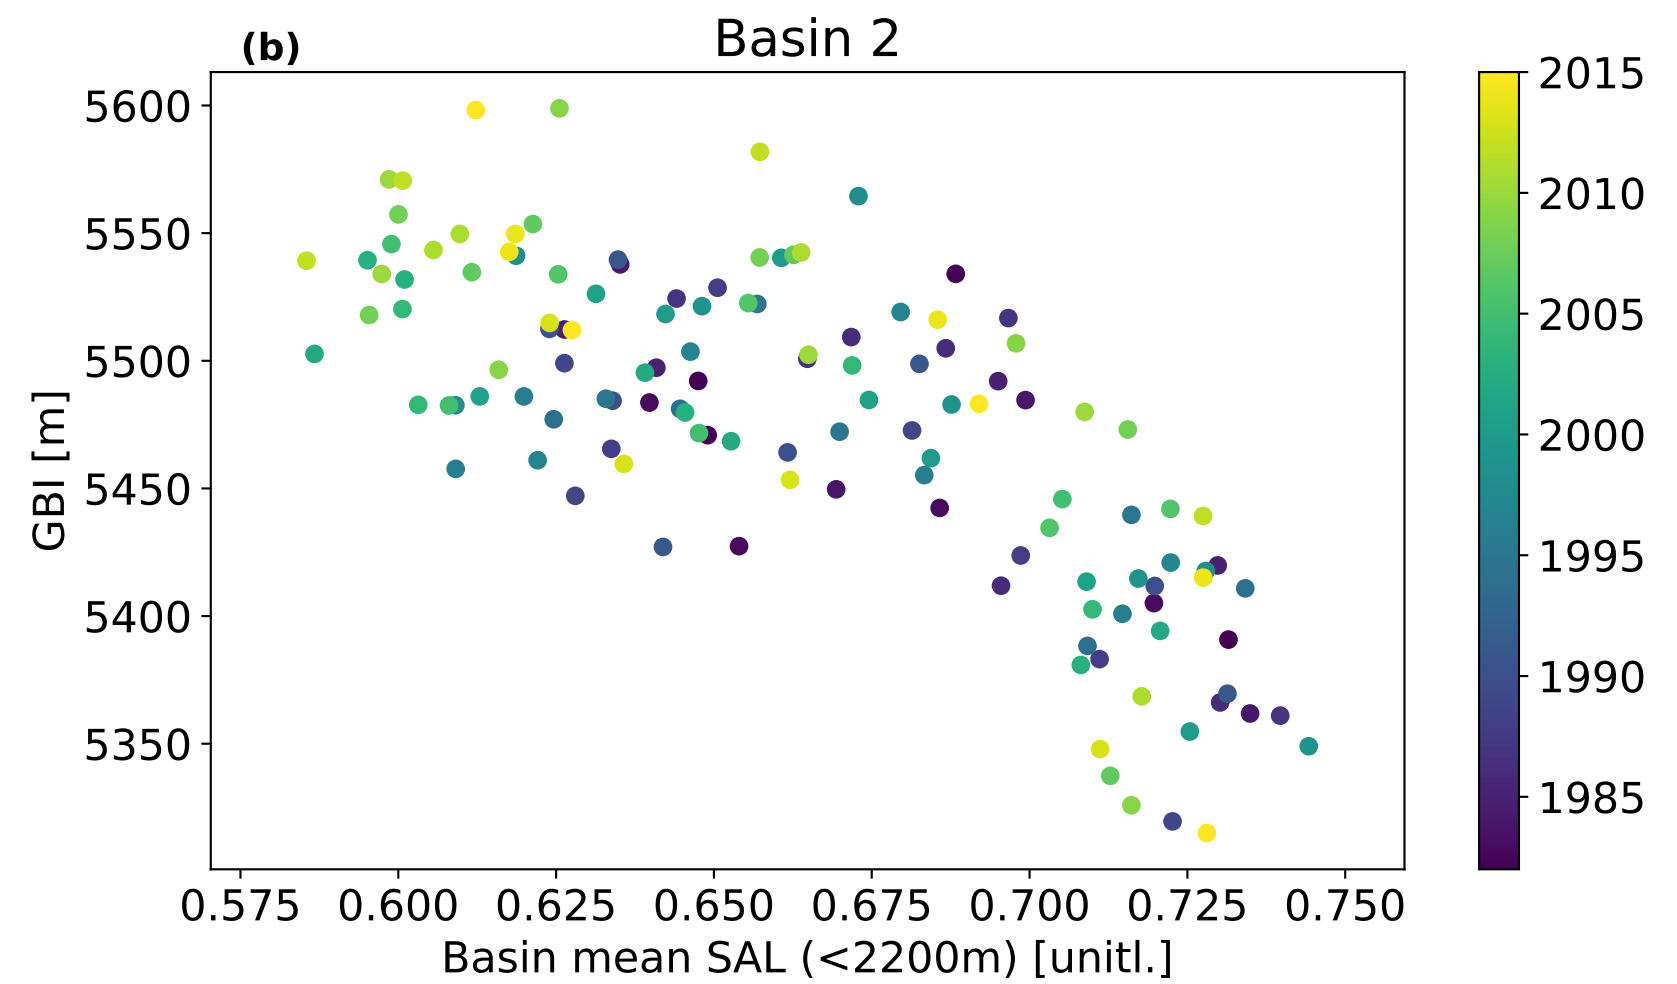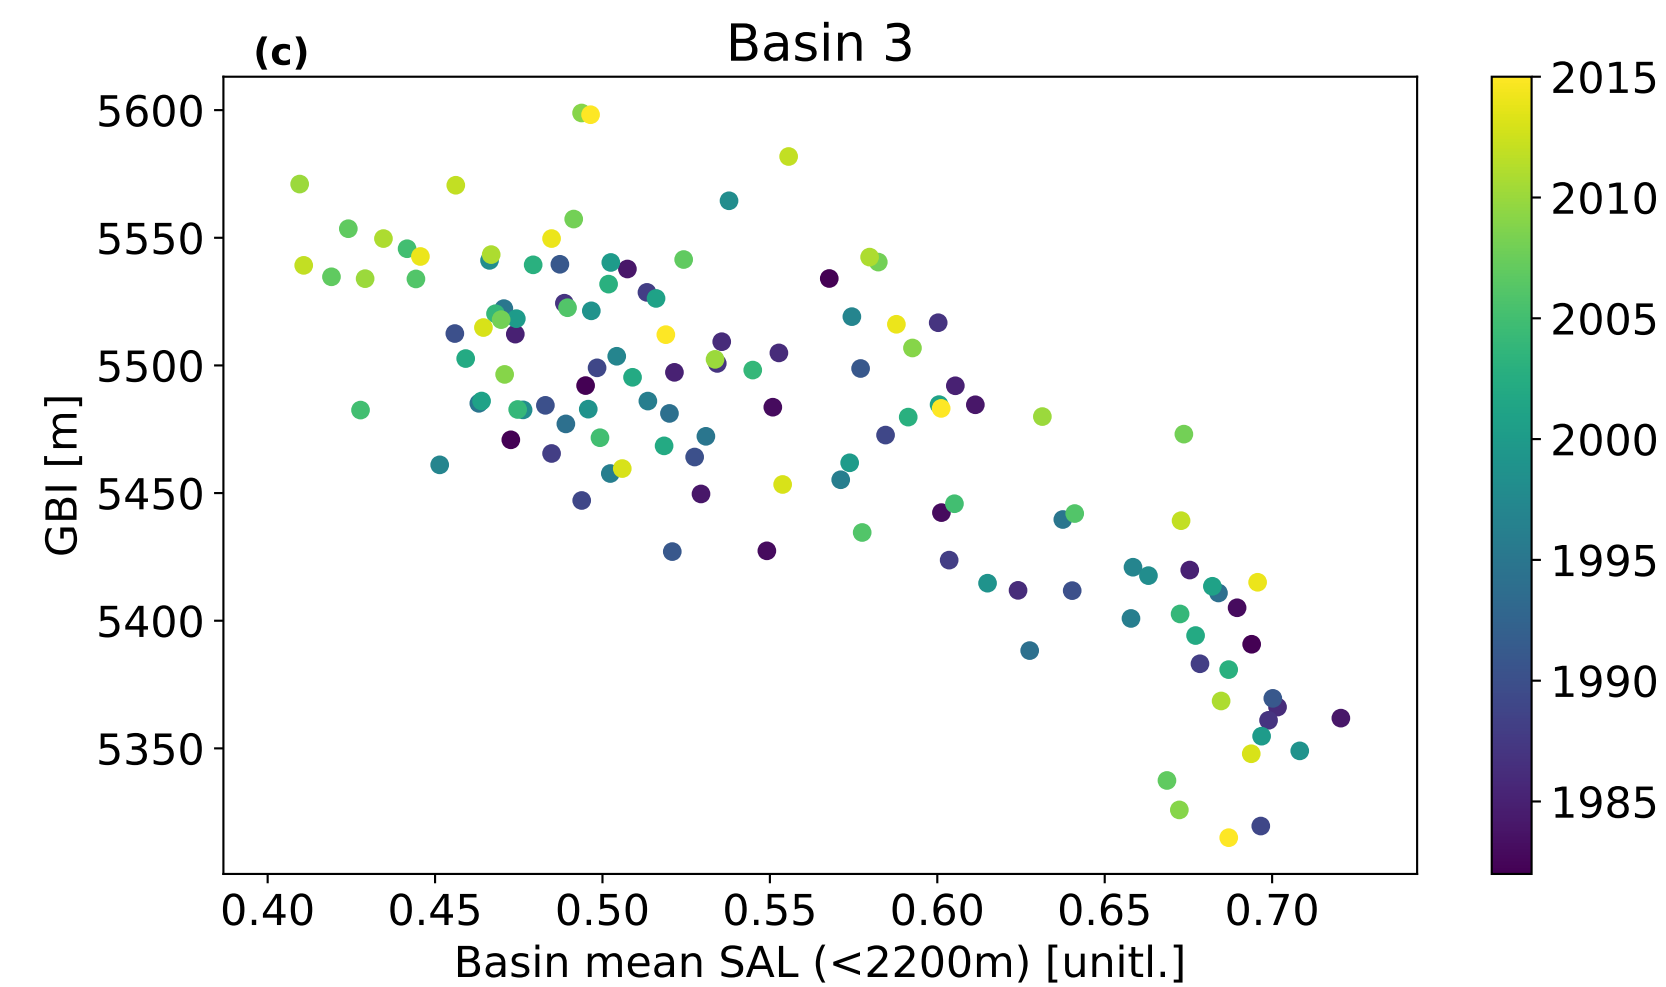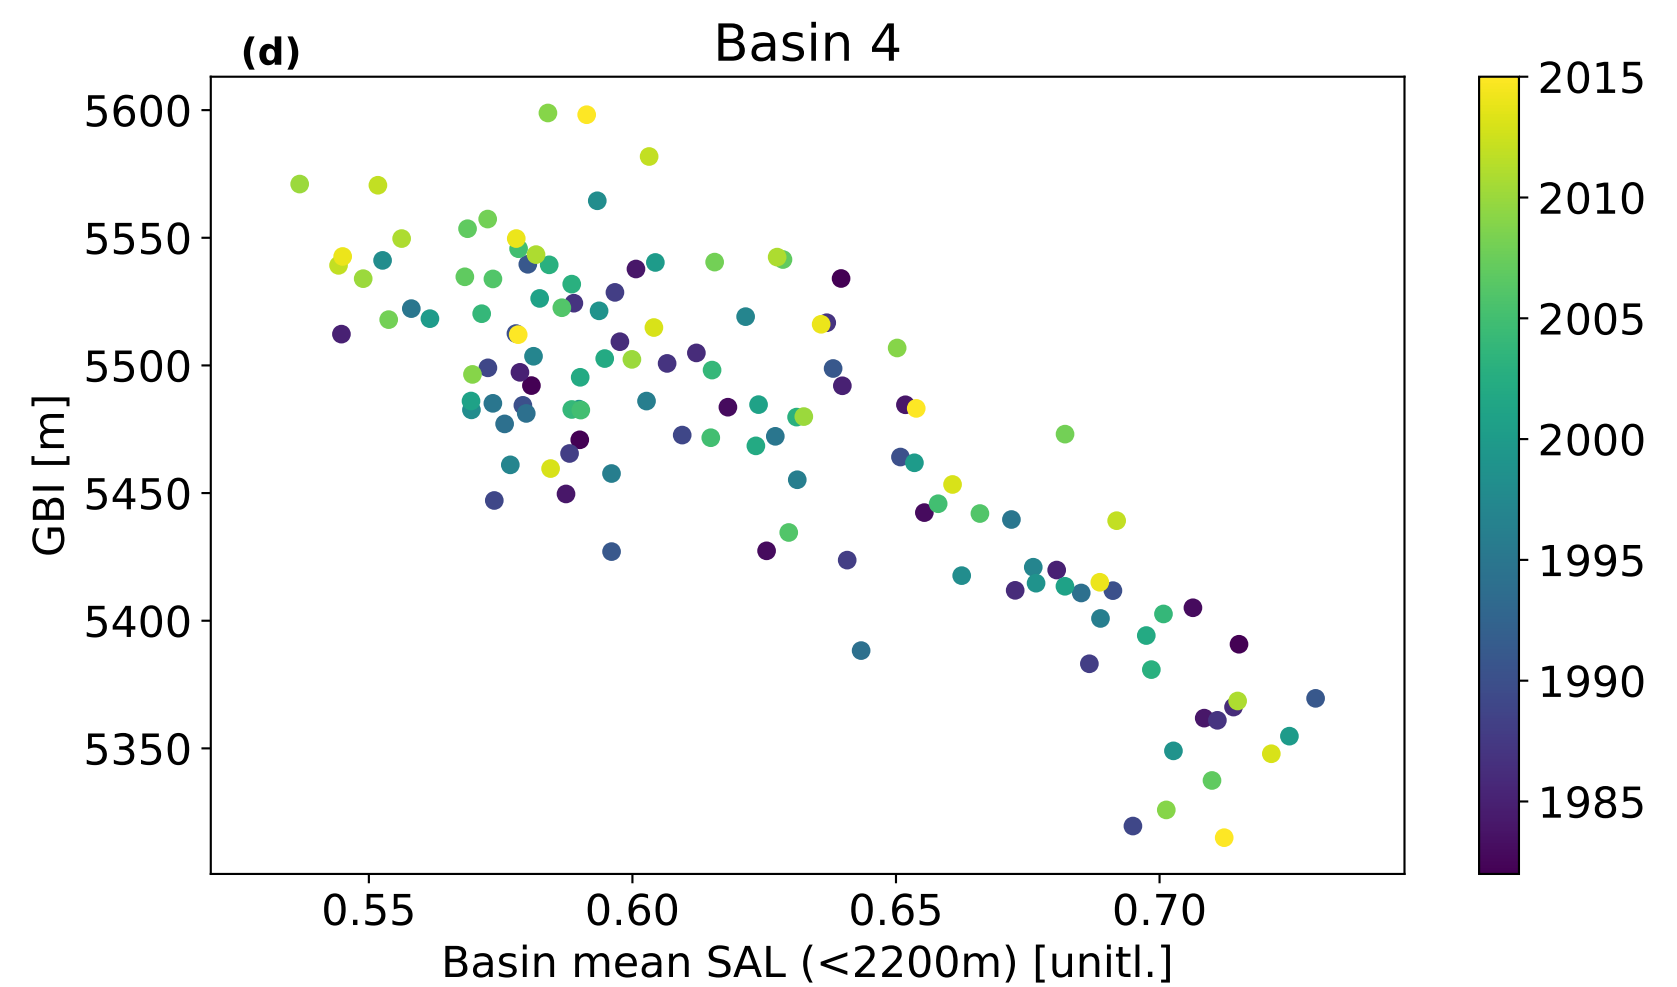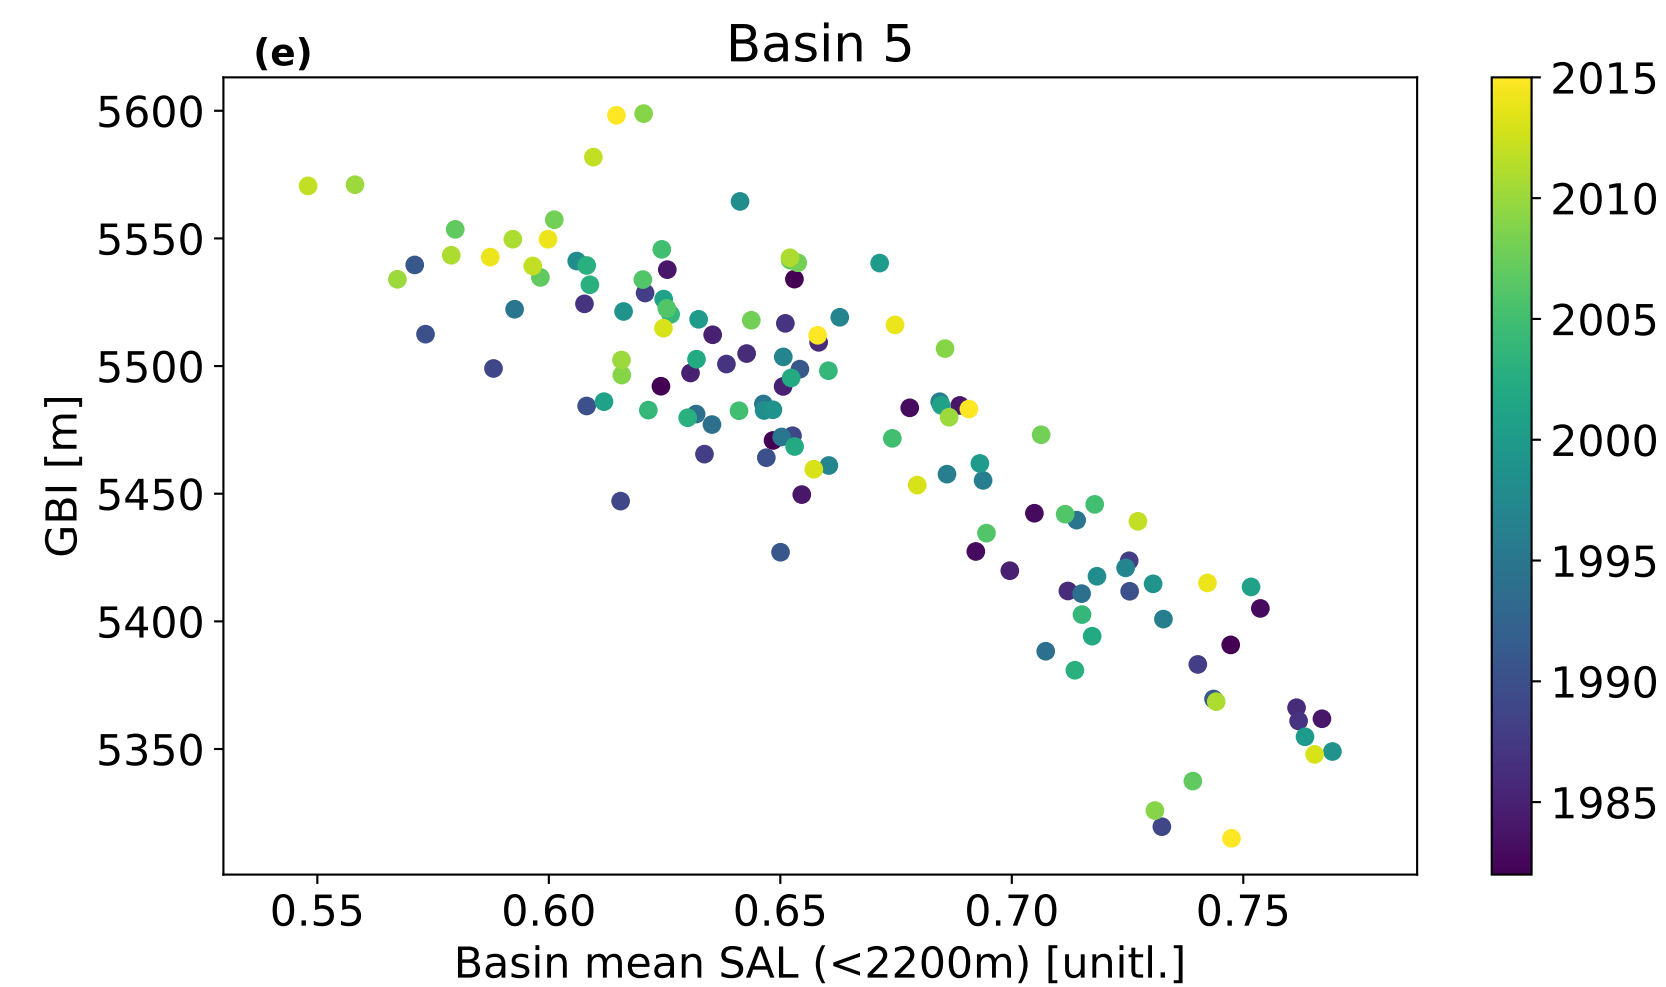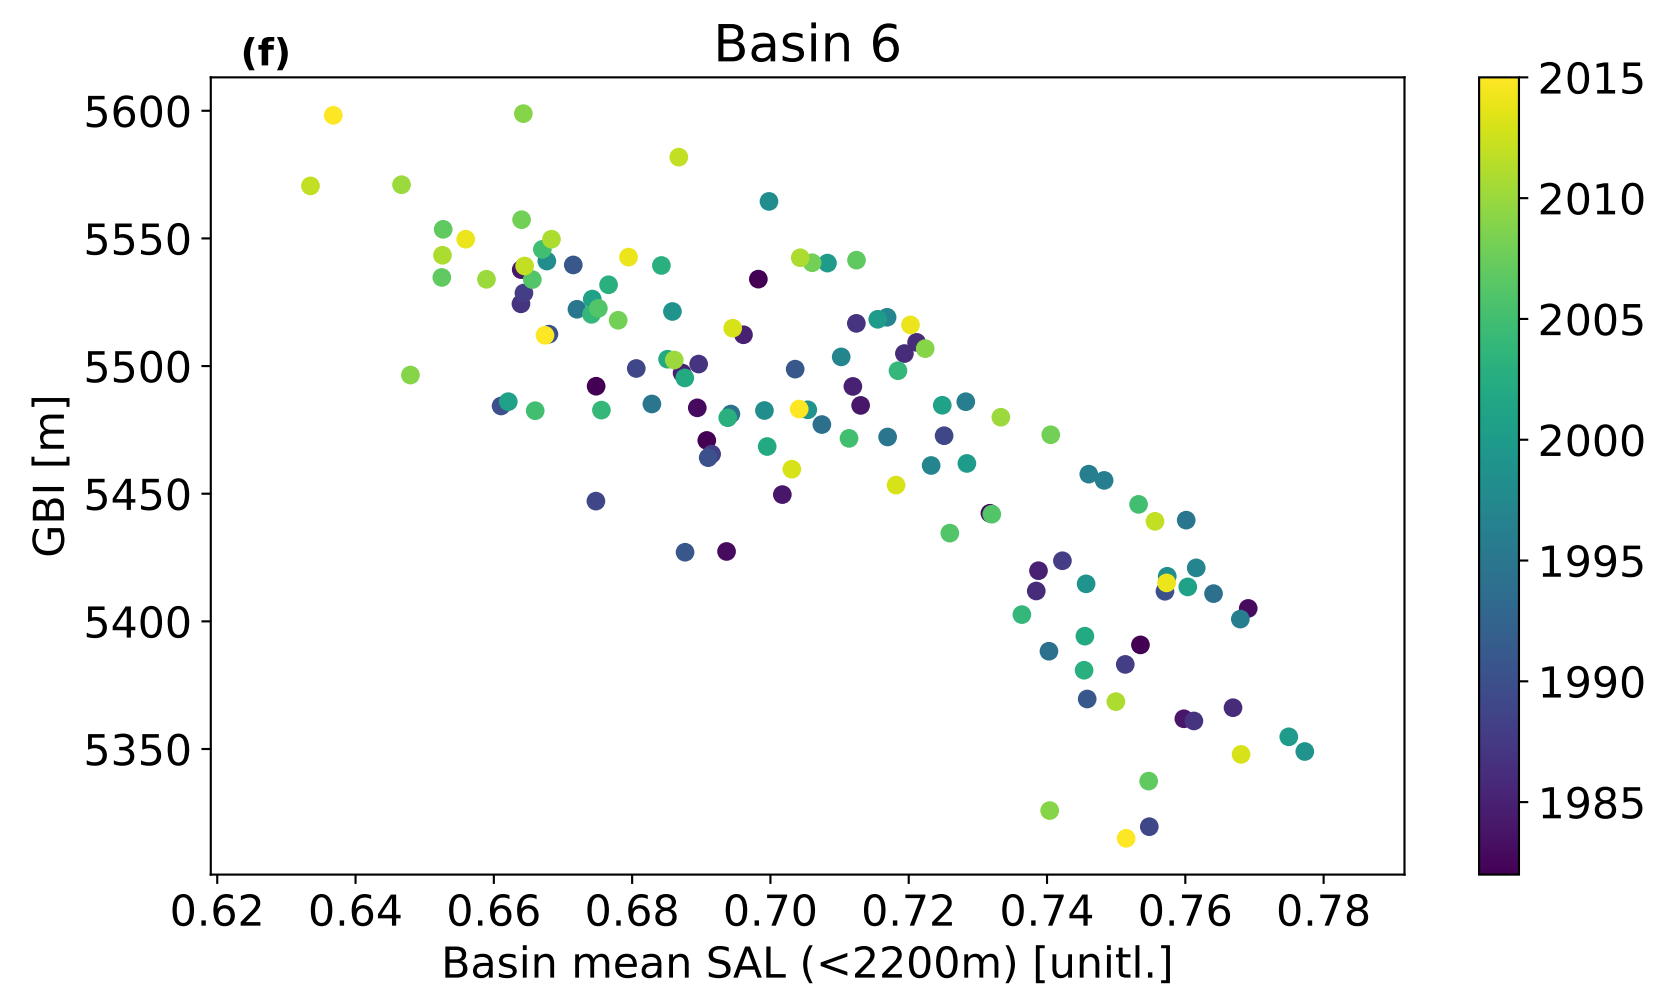

Supplement: Supplementary file 1 [file tc-2019-65-supplement.zip]
